# Determination of a Threshold Dose to Reduce or Eliminate CdTe-Induced Toxicity in L929 Cells by Controlling the Exposure Dose

Xiaorun Liu<sup>1,2</sup>, Meng Tang<sup>1,2\*</sup>, Ting Zhang<sup>1,2</sup>, Yuanyuan Hu<sup>1,2</sup>, Shanshan Zhang<sup>1,2</sup>, Lu Kong<sup>1,2</sup>, Yuying Xue<sup>1,2</sup>

**1** Key Laboratory of Environmental Medicine and Engineering, Ministry of Education, School of Public Health, Southeast University, Nanjing, China, **2** Jiangsu Key Laboratory for Biomaterials and Devices, Southeast University, Nanjing, China

## Abstract

With the widespread use of quantum dots (QDs), the likelihood of exposure to quantum dots has increased substantially. The application of quantum dots in numerous biomedical areas requires detailed studies on their toxicity. In this study, we aimed to determine the threshold dose which reduced or eliminated CdTe-induced toxicity in L929 cells by controlling the exposure dose. We established a cellular model of acute exposure to CdTe QDs. Cells were exposed to different concentrations of CdTe QDs (2.2 nm and 3.5 nm) followed by illustrative cytotoxicity analysis. The results showed that low concentrations of CdTe QDs (under 10  $\mu\text{g}/\text{mL}$ ) promoted cell viability, caused no obvious effect on the rate of cell apoptosis, intracellular calcium levels and changes in mitochondrial membrane potential, while high concentrations significantly inhibited cell viability. In addition, reactive oxygen species in the 10  $\mu\text{g}/\text{mL}$ -treated group was significantly reduced compared with the control group. In summary, the cytotoxicity of CdTe QDs on L929 cell is dose-dependent, time-dependent and size-dependent. Low concentrations of CdTe QDs (below 10  $\mu\text{g}/\text{mL}$ ) may be nontoxic and safe in L929 cells, whereas high concentrations (above 10  $\mu\text{g}/\text{mL}$ ) may be toxic resulting in inhibition of proliferation and induction of apoptosis in L929 cells.

**Citation:** Liu X, Tang M, Zhang T, Hu Y, Zhang S, et al. (2013) Determination of a Threshold Dose to Reduce or Eliminate CdTe-Induced Toxicity in L929 Cells by Controlling the Exposure Dose. PLoS ONE 8(4): e59359. doi:10.1371/journal.pone.0059359

**Editor:** Sangaru Shiv Shankar, King Abdullah University of Science and Technology, Saudi Arabia

**Received:** October 14, 2012; **Accepted:** February 13, 2013; **Published:** April 5, 2013

**Copyright:** © 2013 Liu et al. This is an open-access article distributed under the terms of the Creative Commons Attribution License, which permits unrestricted use, distribution, and reproduction in any medium, provided the original author and source are credited.

**Funding:** The funders had no role in study design, data collection and analysis, decision to publish, or preparation of the manuscript.

**Competing Interests:** The authors have declared that no competing interests exist.

\* E-mail: tm@seu.edu.cn

## Background

Quantum dots (QDs) are semiconductor nanocrystals with a diameter ranging from 2 to 100 nm and are composed of groups II–VI or III–V elements [1] which have the advantages of a broad excitation spectrum, high extinction coefficients and a narrow emission spectrum [2,3,4,5]. QDs have superior optical properties over other fluorescent dyes and fluorescent nanoparticles due to their photostability, long fluorescent lifetime and high resistance to photobleaching [6,7,8,9], thus, CdTe QDs are gaining increasing attention for potential use in biomedical applications such as bioimaging of tissues, disease diagnosis and biological labeling due to their unique optical and electronic properties [10,11,12,13]. With the wide application of CdTe QDs, exposure to these particles in humans and the environment has raised significant concern with regard to their unanticipated and potentially undesirable harmful side effects. If CdTe QDs are used under safe conditions and are expected to play an important role in the national economy and biomedical fields, it is important to understand the toxic effects of these particles and develop screening methods to eliminate or reduce these effects.

Cell-based in vitro studies play an essential role in meaningful toxicity testing. Numerous toxicological assays have been carried out in order to investigate QD cytotoxicity [14,15,16,17]. Some notable results have been reported regarding the potential

cytotoxicity of QDs and related mechanism [18,19,20,21]. Previous studies have shown that apoptosis is the major route of cell death in the case of cadmium cytotoxicity [22,23]. It has also been suggested that induction of apoptosis is involved in cytotoxicity. It is certain that mechanisms of toxicity of many types of nanoparticles are oxidative. Dumas [24] found that significant amounts of hydroxyl radicals were produced from the QD solutions. Although CdTe is not energetically likely to directly oxidize water to generate OH radicals, indirect mechanisms such as peroxide photolysis/photocatalysis can occur in aqueous solution. Lovric [25] found that QDs could generate reactive oxygen species (ROS), such as hydrogen peroxide and various hydroperoxide radicals, which impaired the plasma membrane, mitochondria and the nucleus, leading to severe cell dysfunction, and even cell death. Another group found that QDs could trigger oxidative processes involving singlet oxygen or electron transfer from QDs to oxygen which induced subsequent lysosomal enlargement and intracellular redistribution. Intracellular calcium levels play an important role in the development of ROS injury, one deleterious consequence due to ROS exposure is the occurrence of large increases in intracellular calcium levels [26,27]. Considering that QDs can generate ROS and induce oxidative stress, the interference by QDs on calcium signals could be a possible mechanism of QD toxicity. Mitochondria is not only a cellular organelle, but participate in various intracellular

processes including cellular  $\text{Ca}^{2+}$  signaling. They can modulate the amplitude and spatiotemporal organization of cytoplasmic  $\text{Ca}^{2+}$  signals due to their ability to rapidly accumulate and release  $\text{Ca}^{2+}$  into the cytosol [28]. Mitochondrial  $\text{Ca}^{2+}$  overload leads to ROS overproduction, which in turn triggers MPTP (mitochondrial permeability transition pore) opening and apoptotic mechanisms [29,30]. Researchers have demonstrated the toxicity of QDs on the basis of several significant parameters, and previous reports have mostly focused on their physicochemical characteristics [31], size, shape, outer coating bioactivity [32,33,34], cell type and exposure time, and little attention has been paid to the exposure concentration. If QDs are used under a certain threshold concentration, they can be innocuous. Some reports have also indicated a dose-dependent cytotoxicity [35], however, limiting QD toxicology by controlling their concentration is still poorly understood due to the paucity of QD toxicological investigations.

In this study, we determined the threshold concentration which reduced or eliminated CdTe-induced toxicity in L929 cells by controlling the exposure dose to provide a valuable reference for a safe dose range. L929 cells were used in this study as an *in vitro* model, which is widely used in toxicology. Firstly, L929 cells were treated with a concentration range of CdTe QDs for various times. The low-concentration promoting and high-concentration inhibiting effects of CdTe QDs on cell viability were tested. Secondly, the effects of CdTe QDs exposure in L929 cells were comprehensively evaluated through the analysis of cell apoptosis, intracellular ROS production, intracellular calcium levels and changes in mitochondrial membrane potential to explore the potential toxic mechanism.

## Materials and Methods

### Quantum Dot Synthesis

The Quantum Dots (QDs) used in this study were 2.2 nm and 3.5 nm in size and synthesized by the Department of Biomedical Engineering, Southeast University, China. Briefly, the generation of CdTe precursors was obtained using an applied potential of  $-1.2$  V in the electrolyte containing 2.0 mmol/L  $\text{CdCl}_2$  and 16.6  $\mu\text{L}$  3-mercaptopropionic acid (MPA) at pH 10 adjusted with 0.1 mol/L NaOH. The solution of CdTe precursors was then heated in a water bath with moderate stirring at  $80^\circ\text{C}$ . The CdTe QDs were gradually crystallized and their size was controlled by changing the heating time to 2 h and 20 h to obtain 2.2 and 3.5 nm-sized CdTe QDs. The resulting CdTe QDs were deposited by acetone, and after centrifugation the precipitate was washed with acetone at least three times and re-dissolved in water. More details are available in a previously published report [36].

### Cell Culture

L929 cells (mouse fibroblasts) were purchased from Shanghai Institute of Cell Biology, Chinese Academy Sciences. L929 cells were one of the first and most widely used cells in cytotoxicity test. Since it has the advantages of easy to culture and subculture *in vitro*, breed rapidly and easy to store, it was applied as cell lines of cytotoxicity evaluation for many materials. L929 cells were recommended as the standard cell line in the cytotoxicity test by American Society for Quality Control in 1982 [37]. L929 cells used in the cytotoxicity tests were cultured in RPMI-1640 medium supplemented with 10% fetal bovine serum, 100 U/mL penicillin and 100  $\mu\text{g}/\text{mL}$  streptomycin (Gibco, USA), and cultured at  $37^\circ\text{C}$  in a humidified atmosphere with 5%  $\text{CO}_2$  and 95% air. Cells were then treated with fresh culture medium containing various concentrations of CdTe. When Cells increased doubled and

redoubled, the vitality of cells was the best, this phase can be identified as the logarithmic growth phase cells, cell in the logarithmic growth phase were used in all the experiments. All the treatments were performed in triplicate in three independent experiments.

### MTT Assay

Percentage cell survival was measured using the (3-[4,5-dimethylthiazol-2-yl]-2,5-diphenyltetrazolium bromide) (MTT) colorimetric assay. L929 cells were grown until they reached 80% confluence, they were then plated into 96-well culture plates at a density of 8000 cells/well in a total volume of 100  $\mu\text{L}$  and allowed to attach and grow for 24 h. The supernatant in each well was then replaced with 1640 medium containing various concentrations of QDs: 0, 2.5, 5, 10, 20, 40, 80, 120, 180 and 240  $\mu\text{g}/\text{mL}$ . After 12, 24, and 48 h of incubation, 100  $\mu\text{L}$  of MTT (Sigma-Aldrich, Shanghai, China) was added to each well. After 4 h incubation, the supernatant was removed and 150  $\mu\text{L}$  dimethyl sulfoxide (Sigma-Aldrich, Shanghai, China) was added to each well. Samples were then shaken for 15 min to dissolve the dark blue crystals. Spectrophotometric data were measured using an automatic microplate reader (Dynex Technologies Company, USA, type MRX) at a wavelength of 490 nm. All experiments were performed in triplicate.

### Morphological Changes

L929 cells were plated in a six-well culture plate at a density of  $1 \times 10^5$  cells/mL and treated with 10, 20 and 40  $\mu\text{g}/\text{mL}$  of QDs for 24 h. The dishes were then washed twice with phosphate-buffered saline (PBS) to remove the culture medium, and the cells were double stained with a mixture of Hoechst 33342 (Sigma-Aldrich, Shanghai, China) and propidium iodide (PI) (Sigma-Aldrich, Shanghai, China). The dyes were added at a final concentration of 5  $\mu\text{g}/\text{mL}$  and 10  $\mu\text{g}/\text{mL}$ , respectively. Cells were observed using a fluorescence microscope after incubation at  $37^\circ\text{C}$  for 15 min. Normal cells were stained blue by Hoechst 33342, cell morphology was healthy and the nucleus was big, while apoptotic cells showed characteristics of irregular cell outline, chromatin condensation and nuclear membrane disruption, necrotic cells were stained red by PI.

### Annexin V-FITC/propidium iodide Apoptosis Assay

Normal, apoptotic, and necrotic cells were distinguished using an Annexin V-FITC/propidium iodide assay kit (KeyGEN Biotech, Nanjing, China) according to the manufacturer's instructions. L929 cells were plated in a six-well culture plate at a density of  $1 \times 10^5$  cells/mL and treated with 10, 20 and 40  $\mu\text{g}/\text{mL}$  of QDs for 24 h. Thereafter, cells were harvested and washed with PBS, resuspended in 400  $\mu\text{L}$  of binding buffer to a density of  $1 \times 10^6$  cells/mL, and 5  $\mu\text{L}$  of Annexin V-FITC was then added to the samples. After incubation for 15 min at  $4^\circ\text{C}$  in the dark, 10  $\mu\text{L}$  of propidium iodide was added and the cells were incubated for 5 min. Flow cytometry (BD FACSCalibur) analysis was performed within 15 min.

### Determination of Intracellular Reactive Oxygen Species (ROS) Generation

The level of intracellular ROS was analyzed using 2',7'-dichlorofluorescein diacetate (DCFH-DA) (Sigma, MO, USA), which is an oxidation-sensitive fluorescence probe. DCFH-DA upon enzymatic hydrolysis by intracellular esterases forms non-fluorescent DCF-H, which is subsequently oxidized to highly fluorescent DCF in the presence of ROS [38,39]. Therefore, the

degree of DCF fluorescence intensity demonstrates the amount of ROS formed in the cells. After treatment with 10, 20, and 40  $\mu\text{g}/\text{mL}$  of QDs for 24 h, the cells were rinsed twice with PBS and then loaded with DCFH-DA 10  $\mu\text{M}$  diluted in serum-free medium and incubated at 37°C for 30 min. All samples were rinsed three times with serum-free medium, and then resuspended in PBS. Fluorescence was measured using flow cytometry at excitation and emission wavelengths of 488 and 525 nm for DCF fluorescence within 30 min.

#### Measurement of Intracellular Calcium Levels ( $[\text{Ca}^{2+}]_i$ )

Changes in  $[\text{Ca}^{2+}]_i$  were measured with the fluorescent probe fluo-3/AM. Fluorescence intensity after labeling was measured using confocal microscopy. For confocal microscopic analyses, the cells were cultured in six-well plates at a density of  $1 \times 10^5$  cells/well and treated with 10, 20 and 40  $\mu\text{g}/\text{mL}$  of QDs for 24 h. The dishes were then washed twice with PBS to remove the culture

medium. Treated and untreated L929 cells were loaded with 10  $\mu\text{M}$  fluo-3/AM incubated at 37°C for 30 min and then washed with PBS containing calcium to remove excess fluo-3/AM before imaging. Micrographs were captured by confocal microscopy (100 M; Carl Zeiss Meditec, GmbH, Jena, Germany) at an excitation wavelength of 488 nm and an emission wavelength of 525 nm within 30 min.

#### Detection of Changes in Mitochondrial Membrane ( $\Delta\Psi_m$ )

Mitochondrial membrane potential was measured using the JC-1 Apoptosis Detection Kit (KeyGEN Biotech, Nanjing, China). L929 cells were cultured at a density of  $1 \times 10^5$  cells/well in six-well plates and treated with 10, 20 and 40  $\mu\text{g}/\text{mL}$  of QDs for 24 h. The cells were then collected, centrifuged, and rinsed twice with PBS, resuspended in 500  $\mu\text{L}$   $1 \times$  Incubation Buffer including 1  $\mu\text{L}$  JC-1 loaded for 30 min at 37°C in the dark. All samples were then

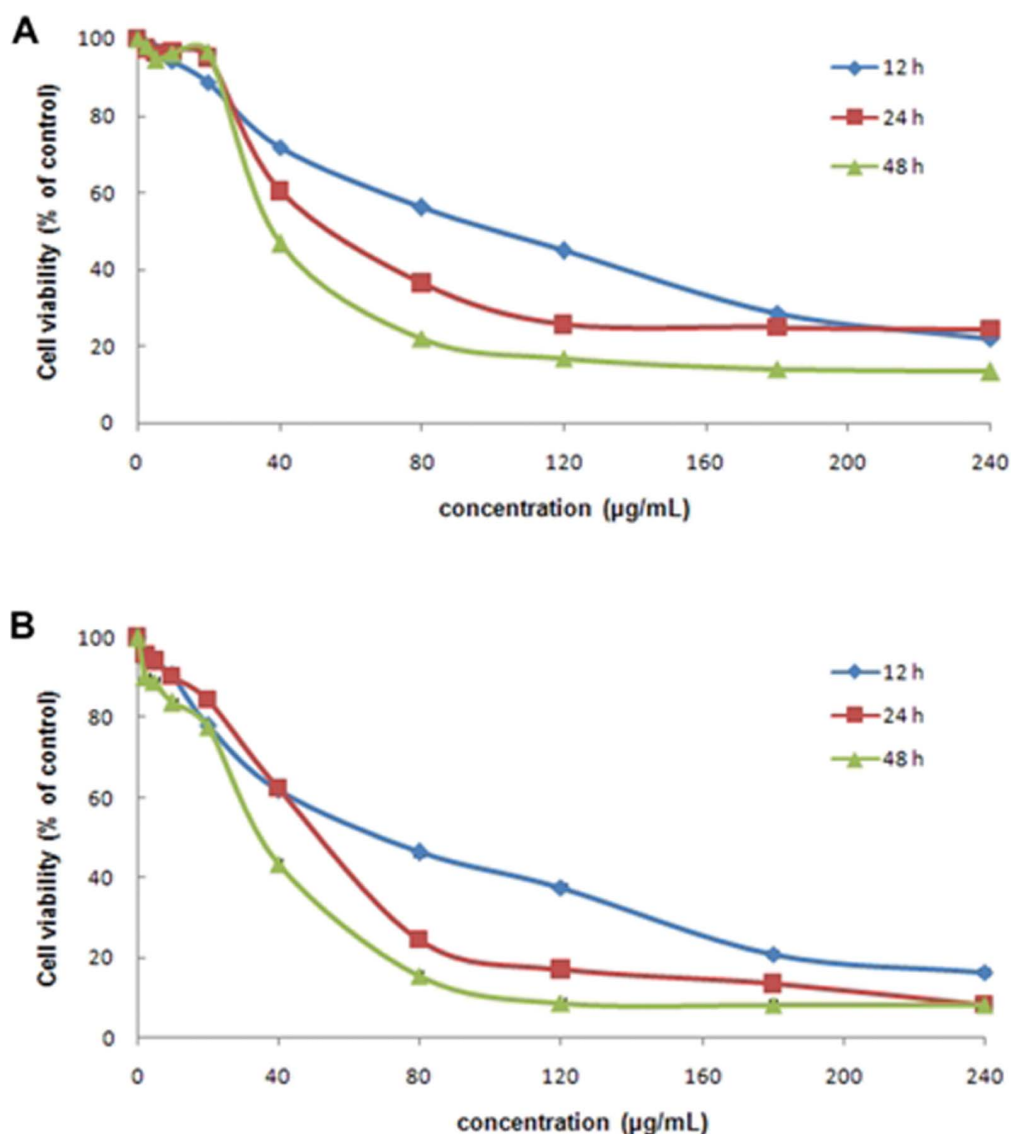

**Figure 1. MTT assay of L929 cell viability after various treatments.** L929 cells treated with (A) 3.5 nm CdTe QDs and (B) 2.2 nm at 2.5–240  $\mu\text{g}/\text{mL}$  for 12, 24 and 48 h. Typical data from one of three independent experiments are shown with similar results compared to the control group.

doi:10.1371/journal.pone.0059359.g001

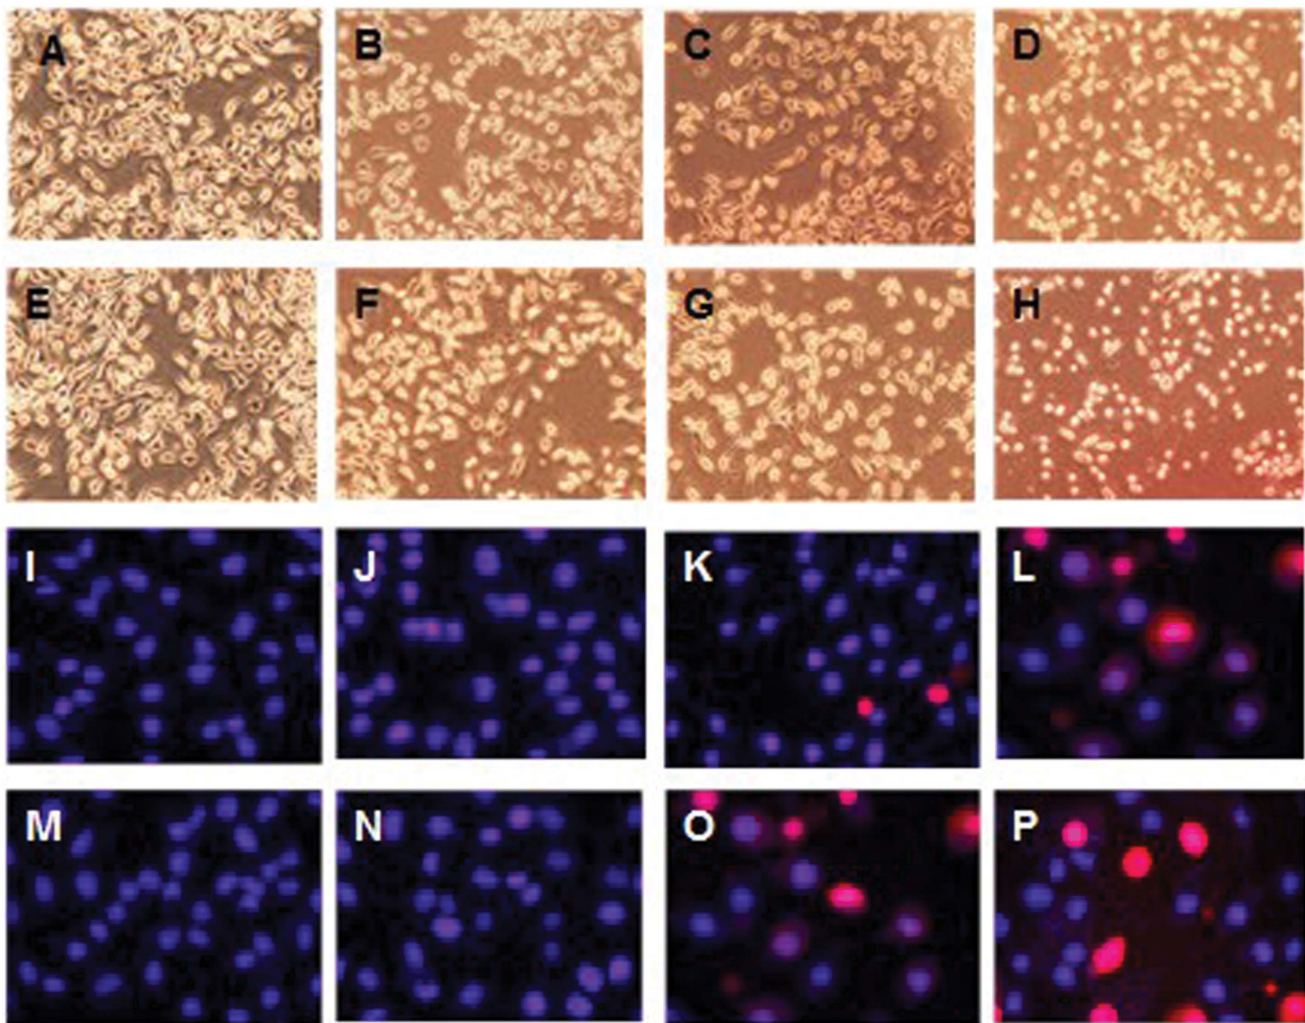

**Figure 2. Representative fluorescent images showing morphological changes in L929 cells treated with CdTe QDs.** (A,I)-control treatment, (B,J) –3.5 nm CdTe 10 µg/ml treatment, (C,K) –3.5 nm CdTe 20 µg/ml treatment, (D,L) –3.5 nm CdTe 40 µg/ml treatment; (E,M)-control treatment, (F,N) –2.2 nm CdTe 10 µg/ml treatment, (G,O) –2.2 nm CdTe 20 µg/ml treatment, (H,P) –2.2 nm CdTe 40 µg/ml treatment. doi:10.1371/journal.pone.0059359.g002

rinsed twice with 1×Incubation Buffer and analyzed immediately by flow cytometry at an excitation wavelength of 488 nm and an emission wavelength of 530 nm.

### Statistical Analysis

All experiments were carried out at least three times unless otherwise indicated. Data are presented as the mean  $\pm$  standard deviation (SD). Statistical significance was tested among and between groups using one-way analysis of variance followed by Dunnett's post hoc test. The results were considered significant if  $p < 0.05$ , when compared to the control.

## Results

### QD Preparation and Characterization

The water-soluble MPA-capped CdTe QDs were prepared according to published procedures. The size and morphology of the CdTe QDs were characterized with high-resolution transmission electron microscopy (HR-TEM). Our TEM study illustrates that the average size of CdTe QDs were  $2.2 \pm 0.25$  nm and  $3.5 \pm 0.49$  nm at heating time of 2 and 20 h (Figure S1). The

absorption peaks occur at 514 and 578 nm, and the PL emission peaks are at 547 and 622 nm ( $\lambda_{\text{exc}} = 388$  nm) for the heating times of 2 and 20 h, respectively (Figure S2). The fluorescent color under UV irradiation changed from green to red with increasing heating time. Comparable dimensions ( $9.82 \pm 1.14$  nm and  $7.39 \pm 0.74$  nm for 3.5 nm and 2.2 nm CdTe QDs) in water solution, and ( $26.79 \pm 1.59$  nm and  $15.65 \pm 1.63$  nm for 3.5 nm and 2.2 nm CdTe QDs) in cell culture media (RPMI-1640 supplemented with 10% fetal bovine serum) after 24 h incubation were confirmed by dynamic light scattering (DLS). The surface charge through  $\zeta$ -potential measurements were ( $-26.46 \pm 4.75$  mV and  $-31.84 \pm 3.06$  mV for 3.5 nm and 2.2 nm CdTe QDs) in water solution, and ( $-13.86 \pm 3.44$  mV and  $-15.73 \pm 4.10$  mV for 3.5 nm and 2.2 nm CdTe QDs) in cell culture media (RPMI-1640 supplemented with 10% fetal bovine serum) after 24 h incubation (Figure S3). Our results show that the size of both CdTe QDs confirmed by DLS in cell culture media are greater than in water solution, and the  $\zeta$ -potential of both CdTe QDs in cell culture media are lower than in water solution. This maybe reflects the formation of a protein corona

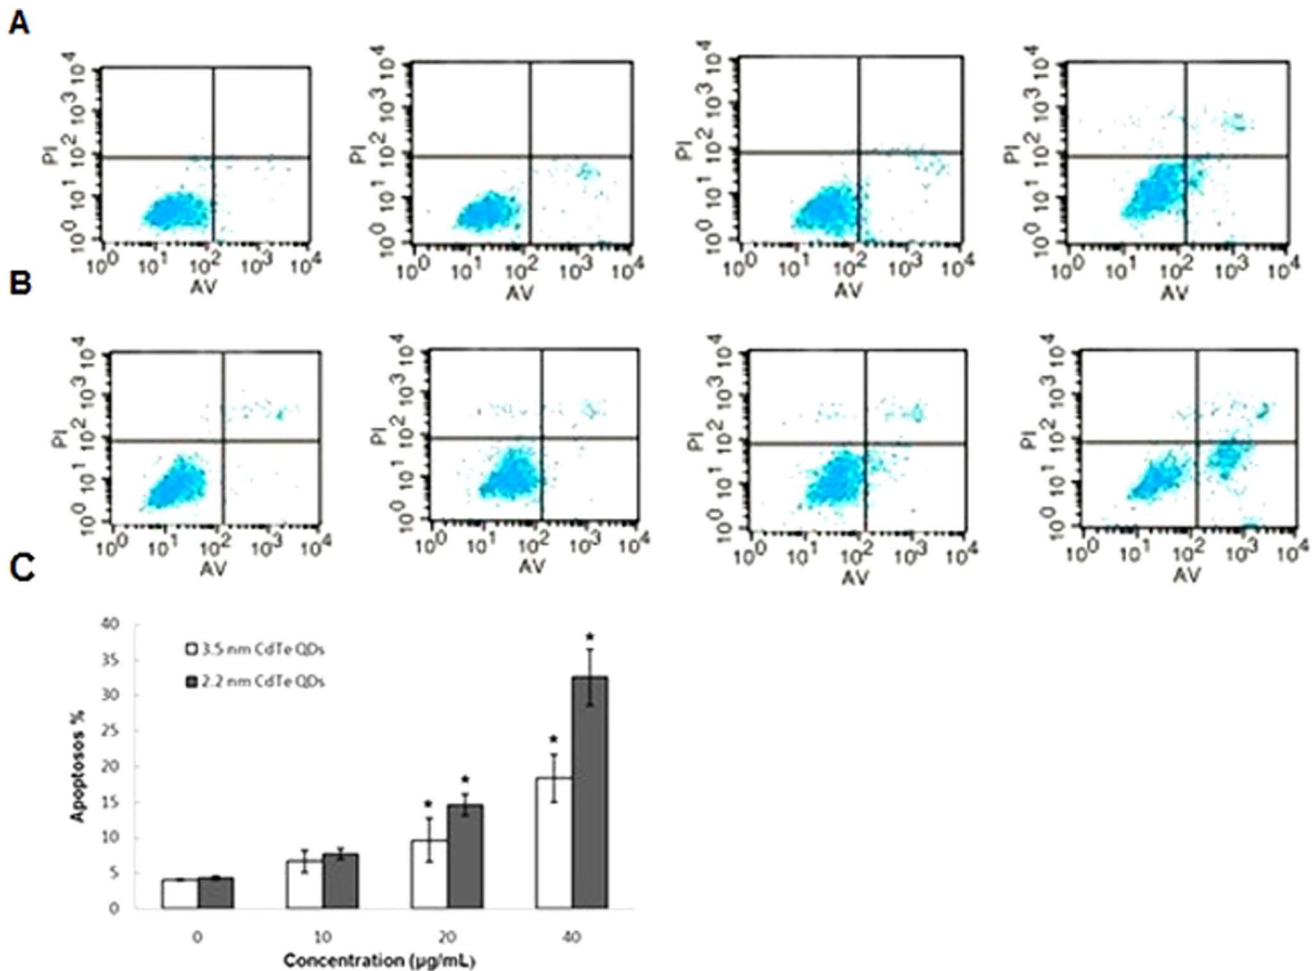

**Figure 3. Annexin V-FITC/PI double staining analysis of apoptosis in L929 cells (24 h).** **A:** L929 cells treated with 3.5 nm CdTe QDs at 0, 10, 20 and 40 µg/ml for 24 h. **B:** L929 cells treated with 2.2 nm CdTe QDs at 0, 10, 20 and 40 µg/ml for 24 h. Top right quadrant, dead cells in the late stage of apoptosis; bottom right quadrant, cells undergoing apoptosis; bottom left quadrant, viable cells. **C:** Quantitative analysis of apoptotic cells after the treatments shown in A and B. Results represent the mean  $\pm$  SD of three independent experiments. One-way analysis of variance followed by Dunnett's post hoc test was used for statistical analysis. \* $p < 0.05$ , indicates a statistically significant difference when compared to the control. doi:10.1371/journal.pone.0059359.g003

around the QDs, as already observed for other kinds of nanoparticles [40,41].

### Cytotoxicity

To test the potential cytotoxicity of CdTe QDs at different concentrations, we used MTT assays to examine the viability of L929 cells and the results are shown in Figure 1. L929 cells were exposed to 3.5 nm and 2.2 nm CdTe QDs for 12, 24 and 48 h at a dosage range from 2.5 to 240 µg/mL. Both sizes of CdTe QDs had little effect on the viability of L929 cells when the concentration was below 20 µg/mL at the various periods (approximately 90% and 80%, respectively), however, when the concentration was higher than 20 µg/mL, viability decreased markedly with increased concentration and time. When the concentration was above 180 µg/mL, cell viability decreased to less than 20%. At the same level of dose and time, the viability of L929 cells was lower when exposed to 2.2 nm CdTe QDs than to 3.5 nm CdTe QDs, the 2.2 nm particles showed much higher cytotoxicity than the 3.5 nm particles.

### Apoptosis

To investigate the influence of different concentrations of CdTe QDs on apoptosis, morphological changes in L929 cells were observed by fluorescence microscopy after 24 h of exposure to 3.5 nm and 2.2 nm CdTe QDs (Figure 2A–D and E–H). Untreated cells (controls) showed healthy morphology. Cells exposed to 3.5 nm and 2.2 nm CdTe QDs did not show significant changes compared to the control cells at the concentration of 10 µg/mL, however, when exposed to 20 µg/mL, cells exhibited similar morphological impairment and showed typical features of the early stages of apoptosis including cell shrinkage, membrane fragmentation, irregularity of cell outline, cell detachment due to loss of adhesion, and oval-shaped appearance (Figure 2C, Figure 2G). In contrast, cells treated with 40 µg/mL displayed characteristics of the late stages of apoptosis which included the formation of apoptotic bodies and secondary necrotic cells (Figure 2D, Figure 2H). We stained L929 cells with Hoechst 33342/PI to observe the morphological changes in more detail exposure to 3.5 nm and 2.2 nm CdTe QDs (Figure 2 I–L and M–P). It can be seen that untreated cells were round and blue in color, while cells treated with a high concentration were necrotic,

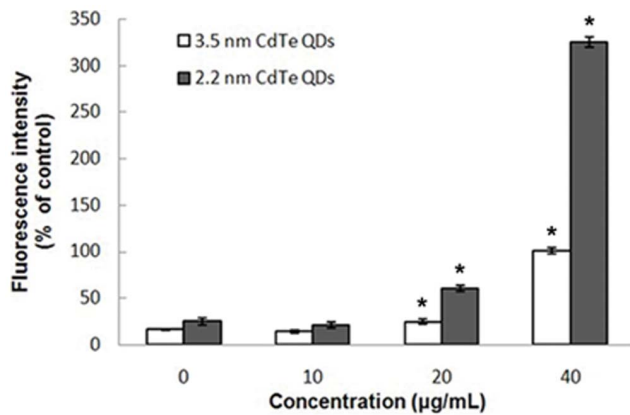

**Figure 4. Quantification of fluorescence intensity showing the relative amount of intracellular ROS formation.** ROS formation in L929 cells exposed to 0, 10, 20 and 40 µg/ml of 3.5 nm and 2.2 nm CdTe QDs for 24 h. The results were quantitatively analyzed for changes in fluorescence intensities within cells and expressed as percent units of DCF fluorescence of the control. Results represent the mean  $\pm$  SD of three independent experiments. One-way analysis of variance followed by Dunnett's post hoc test was used for statistical analysis. \* $p < 0.05$ , indicates a statistically significant difference compared with the control. doi:10.1371/journal.pone.0059359.g004

apoptotic and red in color. In contrast, treated apoptotic cells showed brighter blue light emission than untreated cells.

To quantify cell apoptosis further, the L929 cells exposed to 2.2 nm and 3.5 nm CdTe QDs at concentrations of 10, 20 and 40 µg/mL were stained using Annexin V-FITC/propidium iodide double-staining and analyzed by flow cytometry. Apoptotic cells which lose asymmetry of membrane phospholipids produce phosphatidylserine on the outer leaflet of the plasma membrane. Annexin V, a calcium-dependent phospholipid-binding protein with a high affinity for phosphatidylserine, can therefore be used as a sensitive probe to detect the presence of phosphatidylserine on the cell membrane and hence as a marker of apoptosis. Propidium iodide is a nonspecific DNA intercalating agent, which is excluded by the plasma membrane of living cells, and thus can be used to distinguish apoptotic cells from necrotic and living cells by supravital staining without prior permeabilization [42]. The results of these studies are shown in Figure 3. The percentage of apoptotic cells was 4.03%, 6.61%, 9.61% and 18.32% following treatment with 0, 10, 20 and 40 µg/mL of 3.5 nm CdTe QDs, respectively. For 2.2 nm CdTe QDs, the percentage of apoptotic cells was 4.3%, 7.68%, 14.61% and 32.52%, respectively. From these results, exposure to a low concentration (10 µg/mL) of 3.5 nm or 2.2 nm CdTe QDs had no obvious effect on cell apoptosis, and no statistically significant differences were observed when compared to the control group. However, concentrations greater than 20 µg/mL induced a much higher rate of cell apoptosis, and statistically significant differences were observed when compared to the control group. In addition, 2.2 nm CdTe QDs induced a higher rate of apoptosis in L929 cells than 3.5 nm CdTe QDs at all concentrations.

### ROS Determination

Levels of ROS serve as reliable indicators of oxidative stress. The intracellular formation of ROS is believed to be the causal factor in Cd-induced cytotoxicity, therefore we used the DCFH-DA detection reagent to examine ROS generation in CdTe-treated L929 cells. As hydrogen peroxide or low-molecular weight hydroperoxides produced by cells can oxidize DCFH to the highly

fluorescent compound DCF, the fluorescence intensity is thus proportional to the amount of peroxide produced by the cells [36]. As shown in Figure 4, the DCF fluorescence intensities were significantly increased following exposure to 20 and 40 µg/mL of 2.2 nm and 3.5 nm CdTe QDs ( $60.42 \pm 3.53$  and  $324.88 \pm 5.74$ ,  $24.54 \pm 2.38$  and  $100.95 \pm 3.54$ , respectively) compared to the control group ( $24.83 \pm 3.77$  and  $16.24 \pm 0.50$ ), indicating higher amounts of ROS formation in the cells. There were no significant differences in DCF fluorescence intensities between the 10 µg/mL 2.2 nm and 3.5 nm CdTe-exposed groups ( $20.77 \pm 3.41$ ,  $13.92 \pm 1.51$ ) and the control group. In addition, our results revealed that the intracellular ROS content was significantly higher in 2.2 nm CdTe treated cells than in 3.5 nm CdTe treated cells.

### Intracellular Calcium Levels

Intracellular calcium levels were determined using the fluorescence  $\text{Ca}^{2+}$  indicator, fluo-3/AM, and analyzed by confocal microscopy. The confocal images are shown in Figure 5, and from these images it can be seen that the fluorescence intensity was dose-dependent. QDs elevated intracellular calcium levels. As shown in the 20 and 40 µg/mL 3.5 nm CdTe treatments, the fluorescence intensity increased to  $54.65 \pm 3.11$  and  $83.98 \pm 1.22$ , respectively, and was significantly different to the control group ( $34.03 \pm 1.73$ ). The 10 µg/mL treatment failed to induce a significant rise in intracellular calcium level compared with that in the control as the fluorescence intensity increased to  $46.35 \pm 3.99$ . In the 20 and 40 µg/mL 2.2 nm CdTe treatments, the fluorescence intensities increased to  $68.29 \pm 4.94$  and  $85.44 \pm 2.61$ , respectively, which were significantly different to that of the control group ( $44.95 \pm 8.03$ ). In addition, the 10 µg/mL treatment failed to induce a significant increase in intracellular calcium level compared with the control as the fluorescence intensity changed to  $50.02 \pm 3.58$ . These data suggest that the acute application of CdTe QDs can affect steady-state intracellular calcium by elevating intracellular calcium concentration. However, cells treated with 10 µg/mL showed little change in intracellular calcium levels.

### Mitochondrial Membrane Potential ( $\Delta\Psi_m$ )

We examined the effects of CdTe QDs on mitochondrial membrane potential as a measure of intrinsic apoptosis using JC-1, a dye which is selectively permeable to mitochondria and emits an altered wavelength as it aggregates in the interior of normally polarized mitochondria. As shown in Figure 6, our results show that treatment of L929 cells with 2.2 nm and 3.5 nm CdTe QDs led to significant losses in mitochondrial membrane potential, the percentage decrease in mitochondrial membrane potential was 4.67%, 16.98%, 20.31% and 26.66% at 0, 10, 20 and 40 µg/mL of 3.5 nm CdTe QDs, respectively. For 2.2 nm CdTe QDs, the decrease in mitochondrial membrane potential was 5.60%, 20.07%, 27.35% and 35.52%, respectively. A dose-dependent relationship was demonstrated, and statistically significant differences between the control and treated groups were observed.

### Discussion

With the development of nanotechnology science, the application of QDs in the industrial and biomedical fields will dramatically increase, as will the likelihood of exposure. Many areas of these nanoparticles are unexplored, such as their potential adverse effects on human health. With their increased application, the in vitro and in vivo biodistribution and biosafety of QDs have attracted more and more attention in recent years [43]. Some

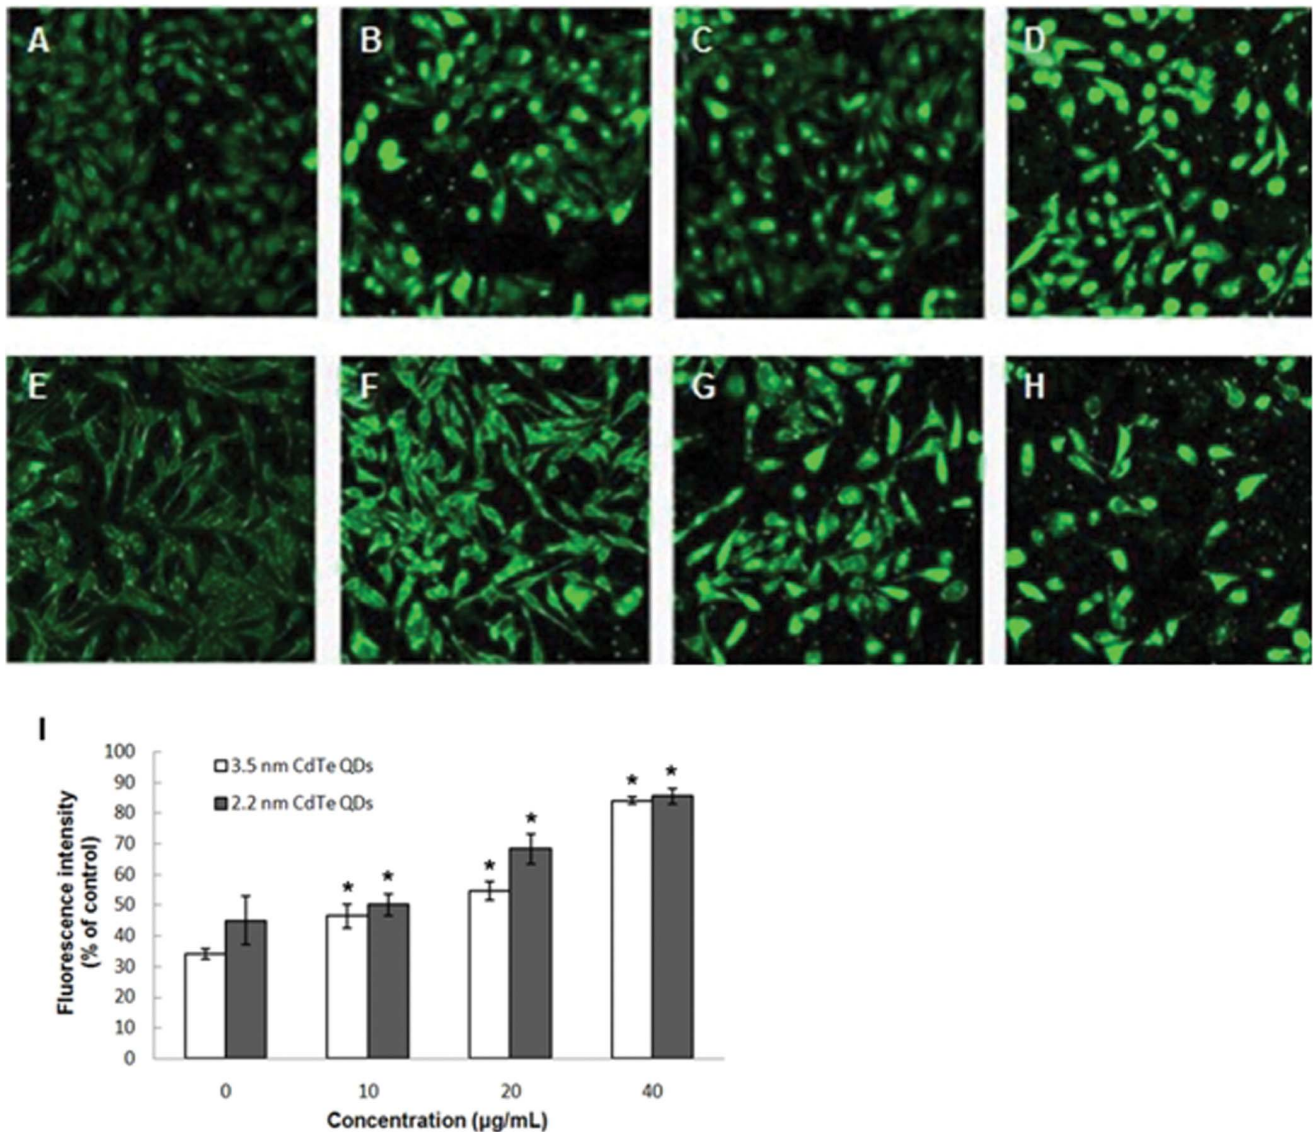

**Figure 5. Confocal microscopic images which show the fluorescence intensity of intracellular calcium formation. A–D:** L929 cells treated with 3.5 nm CdTe QDs at 0, 10, 20 and 40 µg/ml (24 h). **E–H:** L929 cells treated with 2.2 nm CdTe QDs at 0, 10, 20 and 40 µg/ml for 24 h. **I:** Quantification of fluorescence intensity. Results represent the mean  $\pm$  SD of three independent experiments. One-way analysis of variance followed by Dunnett's post hoc test was used for statistical analysis. \* $p < 0.05$ , indicates statistically significant difference compared with the control. doi:10.1371/journal.pone.0059359.g005

scientists have attempted to reduce the toxicity of QDs by surface modifications for further applications in biomedical science, including conjugation and capping with biomolecules and polymers [44,45,46]. The improved QDs may seem innocuous initially, but their accumulation in tissues or cells and long-term exposure to the bioenvironment can destabilize them, which may yield unprotected QDs. Unfortunately, unprotected QDs can impair cell structures and functions and even induce cell death [47]. Impairment of cell structures and functions and a decrease in cell viability by QDs have been observed in a large number of in vitro studies in various cell lines. To date, the available data on the toxicity of QDs have mainly been obtained from studies using high doses. However, limiting QD toxicity by controlling the concentration is still poorly understood due to the paucity of QD toxicological investigations. When the exposure dose is under a certain threshold, QDs can be non-toxic or harmless, therefore, if

we want to reduce QD-induced toxicity to allow extensive use in biological labeling or imaging, we should develop non-toxic QDs by controlling the applied concentration to a low level. This may be the most effective means of producing non-toxic QDs.

Data obtained from our in vitro MTT research showed that 3.5 nm and 2.2 nm CdTe QDs both exhibited slight cytotoxicity in L929 cells at 20 µg/mL. The viability of L929 cells was approximately 90% and 80%, respectively. Our data also showed that both sizes of CdTe QDs induced sharp growth inhibition of L929 cells when the exposure concentration was above 40 µg/mL. These results also showed that the cytotoxicity of CdTe QDs was dose-dependent, time-dependent and size-dependent, which is consistent with a trend reported previously [48,49]. Since the viability effects of high concentration CdTe QDs have been confirmed by many researchers, in the current study we focused mainly on the cellular effects of low concentrations and

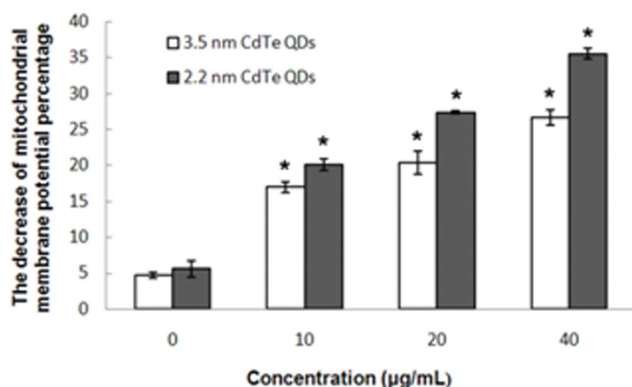

**Figure 6. Flow cytometry demonstrated changes in mitochondrial membrane potential.** L929 cells treated with 3.5 nm and 2.2 nm CdTe QDs at 0, 10, 20 and 40 µg/ml for 24 h. Mitochondria membrane potential was measured using the JC-1 Apoptosis Detection Kit. Results represent the mean  $\pm$  SD of three independent experiments. One-way analysis of variance followed by Dunnett's post hoc test was used for statistical analysis. \* $p < 0.05$ , indicates statistically significant difference compared with the control. doi:10.1371/journal.pone.0059359.g006

investigated the potential molecular mechanism. From the MTT results, the concentration range which resulted in low proliferation was identified and these concentrations (10, 20, 40 µg/mL) were thus used in the following experiments.

Apoptosis, or programmed cell death, is an important way of maintaining homeostasis in terms of cell division and cell death. Apoptosis is a regulated process which can be triggered by different stimuli and is mediated by a cascade of enzymes [50]. Apoptosis results in the fragmentation of cells into apoptotic bodies which are engulfed by neighboring cells and macrophages. To study the cytotoxicity initiated by CdTe QDs further, we investigated apoptosis in L929 cells. Morphological changes and Annexin V-FITC/PI staining showed distinct dose-dependent induction of apoptosis in L929 cells after 24 h of CdTe treatment. Exposure to a low concentration (10 µg/mL) of both 3.5 nm and 2.2 nm CdTe QDs had no statistically significant effect on morphological features and the rate of apoptosis compared to the control group, while concentrations greater than 20 µg/mL induced marked morphological changes and a much higher rate of apoptosis. From these results, we identified a threshold of 10 µg/mL for both 3.5 nm and 2.2 nm CdTe QDs which may be less toxic to L929 cells. In order to determine this threshold, we estimated intracellular ROS formation qualitatively. Oxidative stress is an important mechanism of CdTe-mediated cellular toxicity. The generation of free radicals, particularly ROS, is believed to be partially responsible for the cytotoxicity of QDs [51,52]. Our results demonstrated that exposure to 20 µg/mL and 40 µg/mL of 3.5 nm and 2.2 nm CdTe QDs for 24 h significantly increased intracellular ROS generation in L929 cultures, which is consistent with the reports referred to above. While exposure to 10 µg/mL generated fewer intracellular ROS and reduced inhibition of ROS generation compared to the control group, these findings were the opposite of those observed following exposure to high concentrations. This may have contributed to hormesis. Hormesis is a dose-response phenomenon in which the opposite effects are observed at low, compared to high doses for the same measured parameter. This will result in either an inverted U-shaped or a J-shaped dose-response curve. The concept of hormesis has received considerable interest in the toxicological, pharmacological and general biomedical areas over

the past few years [53,54]. It is clear from the data reported so far that the generation of ROS is partially responsible for the cytotoxicity of QDs. Therefore, controlling the generation of ROS can effectively reduce the toxicity of CdTe QDs. In our experiment, 10 µg/mL CdTe QDs appeared to be non-toxic to L929 cells. Intracellular calcium signaling is generally considered to play a major role in physiological as well as pathological functions. Its concentration in the cellular environment changes in response to a range of signals that allow this ion to modulate cellular function. An overload of intracellular calcium concentration is also one of the main causes of cytotoxicity, and sustained elevation of intracellular calcium may impair various cell functions, for example, impair mitochondrial function and cause chromatin damage, and may eventually lead to cell death [55,56]. As shown by confocal microscopy, our data showed that treatment with 20 and 40 µg/mL of 3.5 nm and 2.2 nm CdTe QDs resulted in a significant increase in the fluorescence intensity of intracellular calcium, whereas treatment with 10 µg/mL failed to induce a significant increase compared with that of the control group. We conclude that concentrations of CdTe QDs under 10 µg/mL have little effect on intracellular calcium level in L929 cells, in other words, at this concentration CdTe QDs are safe since overload of intracellular calcium concentration can cause cytotoxicity. Mitochondria are significant organelles in QD-induced toxicity [57]. Previous studies have shown that mitochondria act as important signaling conduits during programmed cell death and that loss of mitochondrial integrity can be promoted or inhibited by many key regulators of apoptosis [58]. In the present study, we found that both sizes of CdTe QDs induced a concentration-dependent loss in mitochondrial membrane potential when the concentration was greater than 20 µg/mL.

The overall findings in this study indicated that exposure to low concentrations of 3.5 nm and 2.2 nm CdTe QDs (under 10 µg/mL) have little effect on cell viability with no obvious cell apoptosis, reduced ROS generation, no notable effect on intracellular calcium level and little effect on mitochondrial membrane potential in L929 cells. This concentration may serve as a threshold level for these two sizes of QDs only in L929 cells, however, whether exposure to low concentrations of CdTe QDs can provide a protective role in humans remains uncertain and requires further vivo and other experimental study.

## Supporting Information

**Figure S1** TEM image of MPA-capped CdTe QDs and its corresponding size distribution for 2.2 nm (a,b) and 3.5 nm (c,d). (TIF)

**Figure S2** UV-vis absorption (a) and PL spectra (b) of MPA-capped CdTe QDs (2.2 nm and 3.5 nm). The inset shows fluorescent photograph of as-synthesized CdTe QDs under UV irradiation. (TIF)

**Figure S3** Dynamic light scattering (A and B) and  $\zeta$ -potential measurements (C and D) of 3.5 nm and 2.2 nm CdTe QDs. DLS values are the average of at least 10 runs each containing 15 sub-measurements.  $\zeta$ -potential values are the average of at least 10 runs each containing 30 submeasurements. (TIF)

## Acknowledgments

We thank professor Yu Zhang and Changzhi Yan for assistance with experiments and reagents.



## Author Contributions

Conceived and designed the experiments: XL MT. Performed the experiments: XL TZ YH SZ. Analyzed the data: XL LK YX. Contributed reagents/materials/analysis tools: XL. Wrote the paper: XL MT.

## References

- Bruchez JM, Moronne M, Gin P, Weiss S, Alivisatos AP (1998) Semiconductor nanocrystals as fluorescent biological labels. *Science* 281: 2013–2016.
- Fernández-Suárez M, Ting AY (2008) Fluorescent probes for super-resolution imaging in living cells. *Nat Rev Mol Cell Bio* 9: 929–943.
- Lim YT, Kim S, Nakayama A, Stott NE, Bawendi MG, et al. (2003) Selection of quantum dot wavelengths for biomedical assays and imaging. *Mol Imaging* 2: 50–64.
- Tokumasu F, Fairhurst RM, Ostera GR, Brittain NJ, Hwang J, et al. (2005) Band 3 modifications in Plasmodium falciparum-Infected AA and CC erythrocytes assayed by autocorrelation analysis using quantum dots. *J Cell Sci* 118: 1091–1098.
- de Farias PMA, Santos BS, de Menezes FD, de Carvalho Ferreira R, Barjas-Castro ML, et al. (2005) Investigation of red blood cell antigens with highly fluorescent and stable semiconductor quantum dots[J]. *J Biomed Opt* 10: 44023.
- Resch-Genger U, Grabolle M, Cavaliere-Jaricot S, Nitschke R, Nann T (2008) Quantum dots versus organic dyes as fluorescent labels. *Nat Methods* 5: 763–775.
- Hilderbrand SA, Weissleder R (2010) Near infrared fluorescence application to in vivo molecular imaging. *Curr Opin Chem Biol* 14: 71–79.
- Wu CH, Shi LX, Li QN, Jiang H, Selke M, et al. (2010) Probing the dynamic effect of cys-CdTe quantum dots toward cancer cells in vitro. *Chem Res Toxicol* 23: 82–88.
- Vasudevanpillai B, Tamitake I, Abdulaziz A, Athiyaniathil S, Mitsuru I (2008) Semiconductor quantum dots and metal nanoparticles syntheses optical properties and biological applications. *Anal Bioanal Chem* 391: 2469–2495.
- Borchert H, Talapin DV, Gaponik N, McGinley C, Adam S, et al. (2003) Relations between the photoluminescence efficiency of CdTe nanocrystals and their surface properties revealed by synchrotron XPS. *J Phys Chem B* 107: 9662–9668.
- Walkey C, Sykes EA, Chan WCW (2009) Application of semiconductor and metal nanostructures in biology and medicine. *Hematology Am Soc Hematol Educ Program* 1: 701–707.
- Yasushi Sako (2006) Imaging single molecules in living cells for systems biology. *Mol Syst Biol* 2: 56.
- Gao XH, Cui YY, Levenson RM, Chung LWK, Nie SM (2004) In vivo cancer targeting and imaging with semiconductor quantum dots. *Nat Biotechnol* 22: 969–976.
- Aboulaich A, Tilmaci CM, Merlin C, Mercier C, Guilloateau H, et al. (2012) Physicochemical properties and cellular toxicity of (poly) aminoalkoxysilanes-functionalized ZnO quantum dots. *Nanotechnology* 23: 335101.
- Kirchner C, Liedl T, Kudera S, Pellegrino T, Munoz Javier A, et al. (2005) Cytotoxicity of colloidal CdSe and CdSe/ZnS nanoparticles. *Nano Lett* 5: 331–338.
- Chan WH, Shiao NH, Lu PZ (2006) CdSe quantum dots induce apoptosis in human neuroblastoma cells via mitochondrial-dependent pathways and inhibition of survival signals. *Toxicol Lett* 167: 191–200.
- Zhang T, Stilwell JL, Gerion D, Ding L, Elboudwarej O, et al. (2006) Cellular effect of high doses of silica-coated quantum dot profiled with high throughput gene expression analysis and high content cellomics measurements. *Nano Lett* 6: 800–808.
- Li KG, Chen JT, Bai SS, Wen X, Song SY, et al. (2009) Intracellular oxidativestress and cadmium ions release induce cytotoxicity of unmodified cadmium sulfide quantum dots. *Toxicol In Vitro* 23: 1007–1013.
- Cho SJ, Maysinger D, Jain M, Roder B, Hackbarth S, et al. (2007) Long-term exposure to CdTe quantum dots causes functional impairments in live cells. *Langmuir* 23: 1974–1980.
- Zhang G, Shi LX, Selke M, Wang XM (2011) CdTe quantum dots with daunorubicin induce apoptosis of multidrug-resistant human hepatoma HepG2/ADM cells: in vitro and in vivo evaluation. *Nanoscale Res Lett* 6: 418.
- Lu HY, Shiao NH, Chan WH (2006) CdSe Quantum dots induce apoptosis via activation of JNK and PAK2 in a human osteoblast Cell Line. *J Med Biol Eng* 26: 89–96.
- Mahto SK, Yoon TH, Shin H, Rhee SW (2009) Multicompartmented microfluidic device for characterization of dose-dependent cadmium cytotoxicity in BALB/3T3 fibroblast cells. *Biomed Microdevices* 11: 401–411.
- Ye JL, Mao WP, Wu AL, Zhang NN, Zhang C, et al. (2007) Cadmium-induced apoptosis in human normal liver L-02 cells by acting on mitochondria and regulating Ca<sup>2+</sup> signals. *Environ Toxicol Pharmacol* 24: 45–54.
- Dumas E, Gao C, Suffern D, Bradforth SE, Dimitrijevic NM, et al. (2010) Interfacial Charge Transfer between CdTe Quantum Dots and Gram Negative Vs Gram Positive Bacteria. *Environ. Sci. Technol* 44: 1464–1470.
- Lovric J, Cho SJ, Winnik FM, Maysinger D (2005) Unmodified cadmium telluride quantum dots induce reactive oxygen species formation leading to multiple organelle damage and cell death. *Chem Biol* 12: 1227–1234.
- Trump BF, Berezsky IK (1995) Calcium-mediated cell injury and cell death. *FASEB J* 9: 219–228.
- Wang H, Joseph JA (2000) Mechanisms of hydrogen peroxide-induced calcium dysregulation in PC12 cells. *Free Radic Biol Med* 28: 1222–1231.
- Deng X, Yin F, Lu X, Cai B, Yin W (2006) The apoptotic effect of brucine from the seed of *Stychnos nuxvomica* on human hepatoma cells is mediated via Bel-2 and Ca<sup>2+</sup> involved mitochondrial pathway. *Toxicol Sci* 91: 59–69.
- Jackson JG, Thayer SA (2006) Mitochondrial modulation of Ca<sup>2+</sup>-induced Ca<sup>2+</sup>-release in rat sensory neurons. *J Neurophysiol* 96: 1093–1104.
- Dahlem YA, Wolf G, Siemen D, Horn TF (2006) Combined modulation of the mitochondrial ATP-dependent potassium channel and the permeability transition pore causes prolongation of the biphasic calcium dynamics. *Cell Calcium* 39: 387–400.
- Hardman R (2006) A toxicologic review of quantum dots: toxicity depends on physico-chemical and environmental factors. *Environ Health Perspect* 114: 165–172.
- Mahto SK, Park C, Yoon TH, Rhee SW (2010) Assessment of cytocompatibility of surface modified CdSe/ZnSe quantum dots for BALB3T3 fibroblast cells. *Toxicol In Vitro* 24: 1070–1077.
- Zhang HL, Li YQ, Wang JH, Li XN, Lin S, et al. (2010) Special method to prepare quantum dot probes with reduced cytotoxicity and increased optical property. *J Biomed Opt* 15: 1–8.
- Guo GN, Liu W, Liang JG, He ZK, Xu HB, et al. (2007) Probing the cytotoxicity of CdSe quantum dots with surface modification. *Mat Lett* 61: 1641–1644.
- Hoshino A, Hanaki K, Suzuki K, Yamamoto K (2004) Applications of T-lymphoma labeled with fluorescent quantum dots to cell tracing markers in mouse body. *Biochem Biophys Res Commun* 314: 46–53.
- Liu JW, Zhang Y, Ge CW, Jin YL, Hu SL, et al. (2009) Temperature-dependent photoluminescence of highly luminescent water-soluble CdTe quantum dots. *Chinese Chem Lett* 20: 977–980.
- Richardson RR, Miller JA, Reichert WM (1993) Polyimides as biomaterials Preliminary biocompatibility testing. *Biomaterials* 14: 627–635.
- Jia SJ, Jiang DJ, Hu CP, Zhang XH, Deng HW, et al. (2006) Lysophosphatidylcholine-induced elevation of asymmetric dimethylarginine level by the NADPH oxidase pathway in endothelial cells. *Vascul Pharmacol* 44: 143–148.
- Mundy WR, Freudenrich TM (2000) Sensitivity of immature neurons in culture to metal-induced changes in reactive oxygen species and intracellular free calcium. *Neurotoxicology* 21: 1135–1144.
- Maiorano G, Sabella S, Sorce B, Brunetti V, Malvindi MA, et al. (2010) Effects of Cell Culture Media on the Dynamic Formation of Protein-Nanoparticle Complexes and Influence on the Cellular Response. *ACS Nano* 4: 7481–7491.
- Brunetti V, Chibli H, Fiammengio R, Galeone A, Malvindi MA, et al. (2012) InP/ZnS as a safer alternative to CdSe/ZnS core/shell quantum dots: in vitro and in vivo toxicity assessment. *Nanoscale* 5: 309–319.
- Lu X, Qian JC, Zhou HG, Gan Q, Tang W, et al. (2011) In vitro cytotoxicity and induction of apoptosis by silica nanoparticles in human hepG2 hepatoma cells. *International Journal of Nanomedicine* 6: 1889–1901.
- Mrimoy De, Partha S, Rotello VM (2008) Applications of nanoparticles in biology. *Adv Mater* 20: 4225–4241.
- Michalet X, Pinaud FF, Bentolila LA, Tsay JM, Doose S, et al. (2005) Quantum dots for live cells, in vivo imaging, and diagnostics. *Science* 307: 538–544.
- Vlerken LE, Amiji MM (2006) Multi-functional polymeric nanoparticles for tumor-targeted drug delivery. *Expert Opin Drug Deliv* 3: 205–216.
- Zhelev Z, Ohba H, Bakalova R (2006) Single quantum dot-micelles coated with silica shell as potentially non-cytotoxic fluorescent cell tracers. *J Am Chem Soc* 128: 6324–6325.
- Choi AO, Brown SE, Szyf M, Maysinger D (2008) Quantum dot-induced epigenetic and genotoxic changes in human breast cancer cells. *J Mol Med* 86: 291–302.
- Chan WH, Shiao NH, Lu PZ (2006) CdSe quantum dots induce apoptosis in human neuroblastoma cells via mitochondrial-dependent pathways and inhibition of survival signals. *Toxicol Lett* 167: 191–200.
- Santos AR, Miguel AS, Tomaz L, Malho R, Maycock C, et al. (2010) The impact of CdSe/ZnS Quantum Dots in cells of *Medicago sativa* in suspension culture. *J Nanobiotechnology* 8: 24.
- Katunuma N, Murata E, Le QT, Hayashi Y, Ohashi A (2004) New apoptosis cascade mediated by lysosomal enzyme and its protection by epigallocatechin gallate. *Adv Enzyme Regul* 44: 1–10.
- Clarke SJ, Hollmann CA, Zhang Z, Suffern D, Bradforth SE, et al. (2006) Photophysics of dopamine-modified quantum dots and effects on biological systems. *Nat Mater* 5: 409–417.
- Oberdorster G, Maynard A, Donaldson K, Castranova V, Fitzpatrick J, et al. (2005) Principles for characterizing the potential human health effects from

- exposure to nanomaterials: elements of a screening strategy. *Part Fibre Toxicol* 2: 8.
53. Calabrese EJ, Mattson MP (2011) Hormesis provides a generalized quantitative estimate of biological plasticity. *J Cell Commun* 5: 25–38.
  54. Calabrese EJ (2010) Hormesis is central to toxicology, pharmacology and risk assessment. *Hum. Exper Toxicol* 29: 249–261.
  55. Macrez N, Mironneau J (2004) Local  $\text{Ca}^{2+}$  signals in cellular signalling. *Curr Mol Med* 4: 263–275.
  56. Pu Y, Luo KQ, Chang DC (2002) A  $\text{Ca}^{2+}$  signal is found upstream of cytochrome c release during apoptosis in HeLa cells. *Biochem Biophys Res Commun* 299: 762–769.
  57. Chan WH, Shiao NH, Lu PZ (2006) CdSe quantum dots induce apoptosis in human neuroblastoma cells via mitochondrial-dependent pathways and inhibition of survival signals. *Toxicol Lett* 167: 191–200.
  58. Green DR, Reed JC (1998) Mitochondria and apoptosis. *Science* 281: 1309–1312.
